# Supplementary material for: Comparative Efficacy and Safety of PD-1/PD-L1 Inhibitors for Patients with Solid Tumors: A Systematic Review and Bayesian Network Meta-analysis
Source: PubMed Central journal article supplement (PMC7797652; doi:10.7150/jca.49325), 2021-01-01
Supplement: jcav12p1133s1.pdf [file jcav12p1133s1.pdf]

## Supplementary materials

### Search Strategies

#### Search strategy for Pubmed

((("Nivolumab"[Substance] OR "Nivolumab"[tiab] OR "Opdivo"[tiab] OR "MDX-1106"[tiab] OR "ONO-4538"[tiab] OR "BMS-936558"[tiab] OR "NIVO"[tiab]) OR ("Pembrolizumab"[Substance] OR "pembrolizumab" [tiab] OR "lambrolizumab"[tiab] OR "keytruda"[tiab] OR "MK-3475"[tiab] OR "SCH 900475"[tiab]) OR ("Atezolizumab"[Substance] OR "Atezolizumab"[tiab] OR "MPDL3280A"[tiab] OR "MSB0010718C"[tiab] OR "Tecentriq"[tiab] OR "RO5541267"[tiab] OR "RG7446"[tiab]) OR ("Durvalumab"[Substance] OR "Durvalumab "[tiab] OR "MEDI-4736"[tiab] OR "MEDI4736"[tiab]) OR ("Avelumab"[Substance] OR "Avelumab"[tiab] OR "Bavencio"[tiab] OR "MSB0010718C"[tiab]) OR ("checkpoint inhibitor"[All Field] OR " PD-1 "[All Fields] OR "PD-L1"[All Fields])) AND ("carcinoma"[Mesh] OR "cancer"[All Fields] OR "tumor"[tiab]) AND ("random allocation"[MeSH Terms] OR "randomized"[All Fields] OR "clinical trials as topic"[MeSH Terms] OR "trial"[All Fields] OR randomized controlled trial[All Field]) AND ("humans"[MeSH Terms])

#### Search strategy for Web of Knowledge

((("Nivolumab" OR "Opdivo" OR "MDX-1106" OR "ONO-4538" OR "BMS-936558" OR "NIVO") OR ("pembrolizumab" OR "lambrolizumab" OR "keytruda" OR "MK-3475" OR "SCH 900475") OR ("Atezolizumab" OR "MPDL3280A" OR "MSB0010718C" OR "Tecentriq" OR "RO5541267" OR "RG7446") OR ("Durvalumab " OR "MEDI-4736" OR "MEDI4736") OR ("Avelumab" OR "Bavencio" OR "MSB0010718C") OR ("checkpoint inhibitor" OR " PD-1" OR "PD-L1")) AND ("carcinoma" OR "cancer" OR "tumor") AND ("random allocation" OR "randomized" OR "clinical trials as topic" OR "trial" OR randomized controlled trial)

**Supplementary Table S1.** Jadad quality scores of the included trials

| Trial Name          | Randomization | Blinding | An account of all patients | Jadad score |
|---------------------|---------------|----------|----------------------------|-------------|
| KEYNOTE-002         | 2             | 0        | 1                          | 3           |
| CheckMate 037       | 2             | 0        | 1                          | 3           |
| CheckMate 066       | 2             | 2        | 1                          | 5           |
| CheckMate 067       | 2             | 2        | 1                          | 5           |
| CheckMate 069       | 2             | 2        | 1                          | 5           |
| KEYNOTE-006         | 2             | 0        | 1                          | 3           |
| CheckMate 238       | 2             | 2        | 1                          | 5           |
| KEYNOTE-054         | 2             | 0        | 1                          | 3           |
| KEYNOTE-010         | 2             | 0        | 1                          | 3           |
| KEYNOTE-024         | 2             | 0        | 1                          | 3           |
| POPLAR              | 2             | 0        | 1                          | 3           |
| OAK                 | 2             | 0        | 1                          | 3           |
| PACIFIC             | 2             | 2        | 1                          | 5           |
| CheckMate 026       | 2             | 0        | 1                          | 3           |
| JAVELIN Lung 200    | 2             | 0        | 1                          | 3           |
| ARCTIC              | 1             | 0        | 1                          | 2           |
| CheckMate 057       | 2             | 0        | 1                          | 3           |
| KEYNOTE-021         | 2             | 0        | 1                          | 3           |
| KEYNOTE-189         | 2             | 2        | 1                          | 5           |
| IMpower 132         | 1             | 0        | 1                          | 2           |
| IMpower 150         | 2             | 0        | 1                          | 3           |
| CheckMate 017       | 2             | 0        | 1                          | 3           |
| KEYNOTE-407         | 2             | 2        | 1                          | 5           |
| IMpower 133         | 2             | 2        | 1                          | 5           |
| CheckMate 141       | 2             | 0        | 1                          | 3           |
| KEYNOTE-040         | 2             | 0        | 1                          | 3           |
| KEYNOTE-048         | 1             | 0        | 1                          | 2           |
| KEYNOTE-045         | 2             | 0        | 1                          | 3           |
| IMvigor211          | 2             | 0        | 1                          | 3           |
| CheckMate 025       | 2             | 0        | 1                          | 3           |
| JAVELIN Renal 101   | 1             | 0        | 1                          | 2           |
| ATTRACTION-2        | 2             | 2        | 1                          | 5           |
| KEYNOTE-061         | 2             | 0        | 1                          | 3           |
| JAVELIN Gastric 300 | 2             | 0        | 1                          | 3           |
| IMpassion 130       | 2             | 2        | 1                          | 5           |

**Supplementary Figure S1.** Drug-based network meta-analysis in subsequent-line (A) and first-line (B) subgroups. Upper-triangle shows overall survival, and lower-triangle shows progression-free survival.

**A**

|                        |                        |                        |                        |                        |                        |
|------------------------|------------------------|------------------------|------------------------|------------------------|------------------------|
| Control                | <b>0.69(0.63-0.78)</b> | <b>0.75(0.68-0.83)</b> | <b>0.78(0.68-0.89)</b> | <b>0.63(0.46-0.86)</b> | 0.97(0.80-1.18)        |
| <b>0.79(0.63-0.99)</b> | Nivolumab              | 1.08(0.93-1.24)        | 1.12(0.93-1.31)        | 0.91(0.65-1.25)        | <b>1.39(1.12-1.73)</b> |
| 0.83(0.67-1.05)        | 1.05(0.77-1.45)        | Pembrolizumab          | 1.03(0.87-1.22)        | 0.84(0.61-1.16)        | <b>1.29(1.04-1.60)</b> |
| 0.96(0.70-1.34)        | 1.22(0.82-1.80)        | 1.16(0.78-1.71)        | Atezolizumab           | 0.81(0.58-1.14)        | 1.24(0.99-1.59)        |
| 0.71(0.40-1.27)        | 0.87(0.52-1.48)        | 0.85(0.45-1.58)        | 0.74(0.38-1.43)        | Durvalumab             | <b>1.54(1.07-2.21)</b> |
| 1.36(0.90-2.10)        | <b>1.72(1.07-2.79)</b> | <b>1.64(1.02-2.64)</b> | 1.41(0.84-2.43)        | 1.92(0.95-3.98)        | Avelumab               |

**B**

|                        |                        |                        |                 |                 |
|------------------------|------------------------|------------------------|-----------------|-----------------|
| Control                | <b>0.64(0.51-0.82)</b> | <b>0.64(0.53-0.79)</b> | 0.78(0.60-1.01) | 0.78(0.45-1.36) |
| <b>0.54(0.39-0.75)</b> | Nivolumab              | 1.00(0.73-1.37)        | 1.22(0.85-1.71) | 1.22(0.66-2.21) |
| <b>0.66(0.50-0.88)</b> | 1.22(0.79-1.87)        | Pembrolizumab          | 1.21(0.87-1.68) | 1.21(0.67-2.34) |
| <b>0.69(0.48-0.99)</b> | 1.28(0.78-2.07)        | 1.04(0.66-1.65)        | Atezolizumab    | 1.00(0.54-1.84) |
| 0.69(0.33-1.43)        | 1.27(0.57-2.82)        | 1.04(0.48-2.27)        | 1.00(0.44-2.25) | Avelumab        |

**Supplementary Figure S2.** Drug-based network meta-analysis in placebo-controlled (A) and standard-of-care-controlled (SoC) (B) subgroups. Upper-triangle shows overall survival, and lower-triangle shows progression-free survival.

**A**

|                        |                        |                        |                        |                 |                 |
|------------------------|------------------------|------------------------|------------------------|-----------------|-----------------|
| Control                | <b>0.60(0.48-0.78)</b> | <b>0.63(0.51-0.80)</b> | <b>0.78(0.64-0.96)</b> | 0.68(0.43-1.06) | 0.78(0.50-1.22) |
| <b>0.45(0.33-0.61)</b> | Nivolumab              | 1.04(0.75-1.45)        | 1.29(0.93-1.75)        | 1.13(0.67-1.85) | 1.29(0.76-2.13) |
| <b>0.61(0.48-0.77)</b> | 1.34(0.92-1.97)        | Pembrolizumab          | 1.24(0.91-1.64)        | 1.08(0.65-1.75) | 1.23(0.74-2.02) |
| <b>0.69(0.53-0.90)</b> | <b>1.53(1.03-2.28)</b> | 1.14(0.80-1.62)        | Atezolizumab           | 0.87(0.53-1.42) | 1.00(0.61-1.64) |
| <b>0.51(0.30-0.85)</b> | 1.13(0.62-2.05)        | 0.84(0.48-1.47)        | 0.74(0.41-1.31)        | Durvalumab      | 1.15(0.61-2.16) |
| 0.69(0.41-1.16)        | 1.53(0.84-2.79)        | 1.14(0.64-2.02)        | 1.00(0.56-1.79)        | 1.35(0.65-2.81) | Avelumab        |

**B**

|                        |                        |                        |                        |                 |                 |
|------------------------|------------------------|------------------------|------------------------|-----------------|-----------------|
| Control                | <b>0.70(0.60-0.82)</b> | <b>0.71(0.61-0.83)</b> | <b>0.77(0.60-0.99)</b> | 0.63(0.39-1.01) | 0.98(0.72-1.36) |
| <b>0.74(0.59-0.93)</b> | Nivolumab              | 1.02(0.82-1.27)        | 1.10(0.82-1.47)        | 0.90(0.55-1.48) | 1.41(0.99-2.01) |
| 0.82(0.65-1.05)        | 1.11(0.80-1.54)        | Pembrolizumab          | 1.08(0.81-1.44)        | 0.88(0.54-1.45) | 1.38(0.97-1.96) |
| 0.96(0.65-1.43)        | 1.31(0.83-2.05)        | 1.18(0.74-1.85)        | Atezolizumab           | 0.82(0.48-1.40) | 1.28(0.86-1.92) |
| 0.71(0.35-1.43)        | 0.96(0.46-2.00)        | 0.87(0.41-1.80)        | 0.74(0.33-1.64)        | Durvalumab      | 1.57(0.89-2.78) |
| 1.38(0.84-2.30)        | <b>1.87(1.08-3.25)</b> | 1.68(0.97-2.95)        | 1.43(0.76-2.73)        | 1.95(0.82-4.63) | Avelumab        |

**Supplementary Figure S3.** Drug-based network meta-analysis in melanoma (A) and non-small-cell lung cancer (B) subgroups. Upper-triangle shows overall survival, and lower-triangle shows progression-free survival.

**A**

|                        |                        |                 |
|------------------------|------------------------|-----------------|
| Control                | <b>0.63(0.46-0.89)</b> | 0.74(0.44-1.23) |
| <b>0.51(0.39-0.70)</b> | Nivolumab              | 1.17(0.63-2.13) |
| <b>0.57(0.37-0.87)</b> | 1.11(0.65-1.83)        | Pembrolizumab   |

**B**

|                        |                        |                        |                        |                        |                 |
|------------------------|------------------------|------------------------|------------------------|------------------------|-----------------|
| Control                | <b>0.75(0.60-0.96)</b> | <b>0.58(0.48-0.71)</b> | <b>0.76(0.62-0.93)</b> | <b>0.65(0.48-0.90)</b> | 0.90(0.60-1.34) |
| 0.86(0.62-1.22)        | Nivolumab              | 0.77(0.57-1.04)        | 1.01(0.73-1.37)        | 0.87(0.58-1.27)        | 1.19(0.74-1.88) |
| <b>0.60(0.46-0.79)</b> | 0.70(0.45-1.08)        | Pembrolizumab          | 1.31(0.98-1.72)        | 1.13(0.98-1.72)        | 1.55(0.99-2.39) |
| 0.75(0.56-1.01)        | 0.87(0.55-1.36)        | 1.24(0.84-1.84)        | Atezolizumab           | 0.86(0.59-1.25)        | 1.18(0.76-1.85) |
| <b>0.59(0.39-0.90)</b> | 0.68(0.40-1.18)        | 0.97(0.60-1.62)        | 0.79(0.47-1.31)        | Durvalumab             | 1.37(0.83-2.29) |
| 1.16(0.64-2.11)        | 1.34(0.67-2.66)        | 1.92(1.00-3.70)        | 1.55(0.79-2.99)        | 1.97(0.94-4.06)        | Avelumab        |

**Supplementary Figure S4.** (A) Sensitivity analysis of overall survival (upper triangle) and progression-free survival (lower triangle) according to the drug-based network meta-analysis. (Corresponding to Fig. 3A). (B) Sensitivity analysis of  $\geq$ Grade 3 treatment-related adverse events according to the drug-based network meta-analysis of placebo-controlled (upper triangle) or standard-of-care-controlled (SoC) trials (lower triangle) (Corresponding to Fig. 3B).

**A**

|                        |                        |                        |                        |                        |                        |
|------------------------|------------------------|------------------------|------------------------|------------------------|------------------------|
| Control                | <b>0.69(0.60-0.80)</b> | <b>0.69(0.62-0.78)</b> | <b>0.78(0.67-0.90)</b> | <b>0.65(0.48-0.89)</b> | 0.92(0.72-1.16)        |
| <b>0.76(0.61-0.97)</b> | Nivolumab              | 1.00(0.83-1.19)        | 1.12(0.91-1.37)        | 0.94(0.67-1.32)        | <b>1.33(1.01-1.75)</b> |
| <b>0.74(0.61-0.90)</b> | 0.97(0.72-1.31)        | Pembrolizumab          | 1.12(0.93-1.35)        | 0.95(0.68-1.31)        | <b>1.33(1.02-1.73)</b> |
| 0.79(0.62-1.01)        | 1.03(0.73-1.45)        | 1.06(0.78-1.46)        | Atezolizumab           | 0.84(0.60-1.19)        | 1.18(0.89-1.57)        |
| <b>0.59(0.37-0.95)</b> | 0.78(0.46-1.32)        | 0.80(0.48-1.33)        | 0.75(0.44-1.28)        | Durvalumab             | 1.41(0.95-2.07)        |
| 1.06(0.72-1.60)        | 1.39(0.88-2.21)        | 1.43(0.93-2.23)        | 1.35(0.85-2.16)        | 1.79(0.97-3.32)        | Avelumab               |

**B**

|                        |                 |                 |                 |                 |                 |
|------------------------|-----------------|-----------------|-----------------|-----------------|-----------------|
| Placebo/SoC            | 2.37(0.68-8.29) | 1.35(0.89-2.27) | 1.17(0.71-1.94) | 1.15(0.41-3.21) | 1.00(0.37-2.73) |
| <b>0.36(0.26-0.50)</b> | Nivolumab       | 0.57(0.16-2.26) | 0.49(0.13-1.91) | 0.49(0.10-2.44) | 0.42(0.09-2.09) |
| <b>0.39(0.28-0.53)</b> | 1.07(0.68-1.72) | Pembrolizumab   | 0.87(0.41-1.65) | 0.85(0.26-2.52) | 0.74(0.23-2.12) |
| <b>0.37(0.22-0.60)</b> | 1.02(0.57-1.85) | 0.95(0.53-1.70) | Atezolizumab    | 0.98(0.31-3.07) | 0.85(0.28-2.61) |
| 0.67(0.29-1.58)        | 1.86(0.75-4.70) | 1.74(0.70-4.33) | 1.82(0.68-4.91) | Durvalumab      | 0.87(0.31-2.41) |
| <b>0.24(0.13-0.45)</b> | 0.66(0.33-1.35) | 0.61(0.30-1.24) | 0.64(0.29-1.44) | 0.35(0.12-1.02) | Avelumab        |

**Supplementary Figure S5.** Category-based network meta-analysis in subsequent-line (A) and first-line (B) subgroups. Upper-triangle shows overall survival, and lower-triangle shows progression-free survival.

**A**

|                        |                        |                        |
|------------------------|------------------------|------------------------|
| Control                | <b>0.73(0.67-0.78)</b> | <b>0.78(0.69-0.87)</b> |
| <b>0.81(0.70-0.95)</b> | PD-1 inhibitors        | 1.08(0.93-1.23)        |
| 0.95(0.75-1.20)        | 1.17(0.88-1.54)        | PD-L1 inhibitors       |

**B**

|                        |                        |                        |
|------------------------|------------------------|------------------------|
| Control                | <b>0.64(0.55-0.76)</b> | <b>0.78(0.62-0.98)</b> |
| <b>0.80(0.68-0.94)</b> | PD-1 inhibitors        | 1.22(0.92-1.60)        |
| 0.96(0.75-1.25)        | 1.21(0.89-1.64)        | PD-L1 inhibitors       |

**Supplementary Figure S6.** Category-based network meta-analysis in placebo-controlled (A) and standard-of-care-controlled (SoC) (B) subgroups. Upper-triangle shows overall survival, and lower-triangle shows progression-free survival.

**A**

|                 |                 |                  |
|-----------------|-----------------|------------------|
| Control         | 0.62(0.54-0.72) | 0.77(0.65-0.90)  |
| 0.54(0.44-0.66) | PD-1 inhibitors | 1.24(0.99-1.53)  |
| 0.66(0.51-0.84) | 1.21(0.88-1.67) | PD-L1 inhibitors |

**B**

|                 |                 |                  |
|-----------------|-----------------|------------------|
| Control         | 0.71(0.64-0.79) | 0.81(0.69-0.95)  |
| 0.80(0.68-0.94) | PD-1 inhibitors | 1.15(0.94-1.38)  |
| 0.96(0.75-1.25) | 1.21(0.89-1.64) | PD-L1 inhibitors |

**Supplementary Figure S7.** Category-based network meta-analysis in non-small-cell lung cancer (A), urinary system cancer (B) and Gastric or gastro-esophageal junction cancer (C) subgroups. Upper-triangle shows overall survival, and lower-triangle shows progression-free survival.

**A**

|                 |                 |                  |
|-----------------|-----------------|------------------|
| Control         | 0.65(0.55-0.77) | 0.75(0.63-0.89)  |
| 0.69(0.55-0.87) | PD-1 inhibitors | 1.17(0.91-1.46)  |
| 0.75(0.59-0.97) | 1.09(0.77-1.53) | PD-L1 inhibitors |

**B**

|                 |                 |                  |
|-----------------|-----------------|------------------|
| Control         | 0.73(0.49-1.08) | 0.83(0.55-1.21)  |
| 0.92(0.47-1.86) | PD-1 inhibitors | 1.14(0.64-1.94)  |
| 0.79(0.41-1.68) | 0.86(0.34-2.40) | PD-L1 inhibitors |

**C**

|                 |                 |                  |
|-----------------|-----------------|------------------|
| Control         | 0.71(0.25-2.07) | 1.10(0.24-4.98)  |
| 0.86(0.21-3.58) | PD-1 inhibitors | 1.55(0.24-9.70)  |
| 1.73(0.23-13.1) | 2.01(0.17-24.2) | PD-L1 inhibitors |

**Supplementary Figure S8.** (A) Sensitivity analysis of overall survival (upper triangle) and progression-free survival (lower triangle) according to the category-based network meta-analysis. (Corresponding to Fig. 5A). (B) Sensitivity analysis of  $\geq$ Grade 3 treatment-related adverse events according to the category-based network meta-analysis of placebo-controlled (upper triangle) or standard-of-care-controlled (SoC) trials (lower triangle) (Corresponding to Fig. 5C).

**A**

|                 |                 |                  |
|-----------------|-----------------|------------------|
| Control         | 0.69(0.63-0.76) | 0.75(0.66-0.86)  |
| 0.78(0.67-0.89) | PD-1 inhibitors | 1.09(0.92-1.28)  |
| 0.75(0.61-0.93) | 0.97(0.76-1.25) | PD-L1 inhibitors |

**B**

|                 |                 |                  |
|-----------------|-----------------|------------------|
| Placebo/SoC     | 2.46(1.95-3.12) | 2.82(1.90-4.20)  |
| 0.37(0.29-0.47) | PD-1 inhibitors | 0.71(0.43-1.10)  |
| 0.36(0.25-0.51) | 0.95(0.61-1.48) | PD-L1 inhibitors |
